# Supplementary material for: Head-to-Head Comparison of Neck 18F-FDG PET/MR and PET/CT in the Diagnosis of Differentiated Thyroid Carcinoma Patients after Comprehensive Treatment
Source: MDPI journal article supplement (doi:10.3390/cancers13143436), 2021-07-09
Supplement: s1 [file s1]

Supplementary Materials:

*Type of the Paper (Article)*

# Head-to-head comparison of neck $^{18}\text{F}$ -FDG PET/MR and PET/CT in the diagnosis of differentiated thyroid carcinoma patients after comprehensive treatment

Yangmeihui Song<sup>1,2#</sup>, Fang Liu<sup>1,2#</sup>, Weiwei Ruan<sup>1,2</sup>, Fan Hu<sup>1,2</sup>, Muhsin H. Younis<sup>3</sup>, Zairong Gao<sup>1,2</sup>, Jie Ming<sup>4</sup>, Tao Huang<sup>4</sup>, Weibo Cai<sup>3,5</sup>, Xiaoli Lan<sup>1,2,\*</sup>

<sup>1</sup> Department of Nuclear Medicine, Union Hospital, Tongji Medical College, Huazhong University of Science and Technology

<sup>2</sup> Hubei Province Key Laboratory of Molecular Imaging

<sup>3</sup> Departments of Radiology and Medical Physics, University of Wisconsin-Madison, Madison, WI, USA

<sup>4</sup> Department of Breast and Thyroid Surgery, Union Hospital, Tongji Medical College, Huazhong University of Science and Technology

<sup>5</sup> University of Wisconsin Carbone Cancer Center, Madison, WI, USA

# Yangmeihui Song and Fang Liu contributed equally to this work.

\* Correspondence: xiaoli\_lan@hust.edu.cn

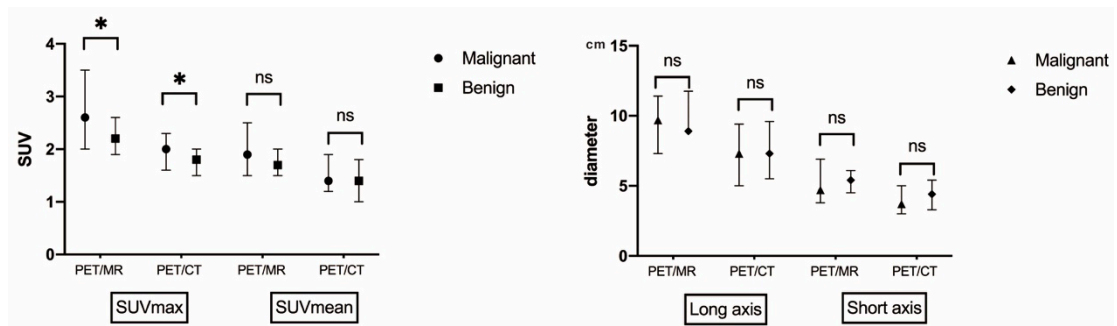

**Figure S1.** SUVs, diameters of malignant and benign lymph nodes detected by both PET/MR and PET/CT;

ns Represents no significance; \* Represents the p-value <0.05

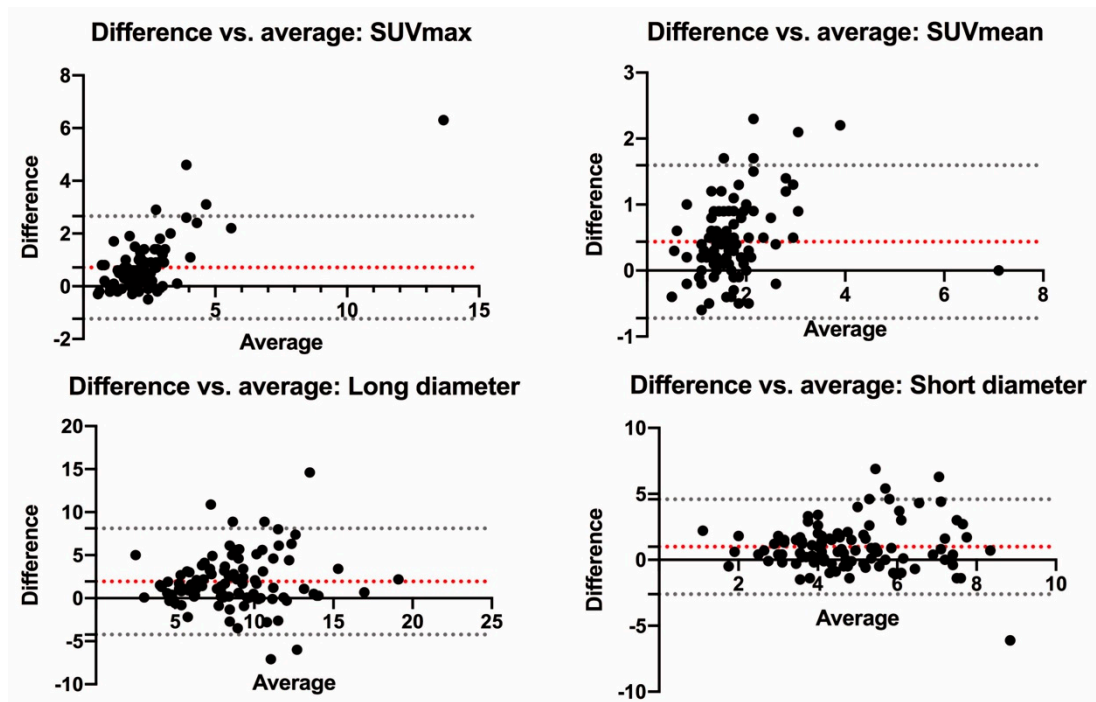

**Figure S2.** The Bland-altman analysis of SUVmax, SUVmean and diameter measurements provided in two modalities

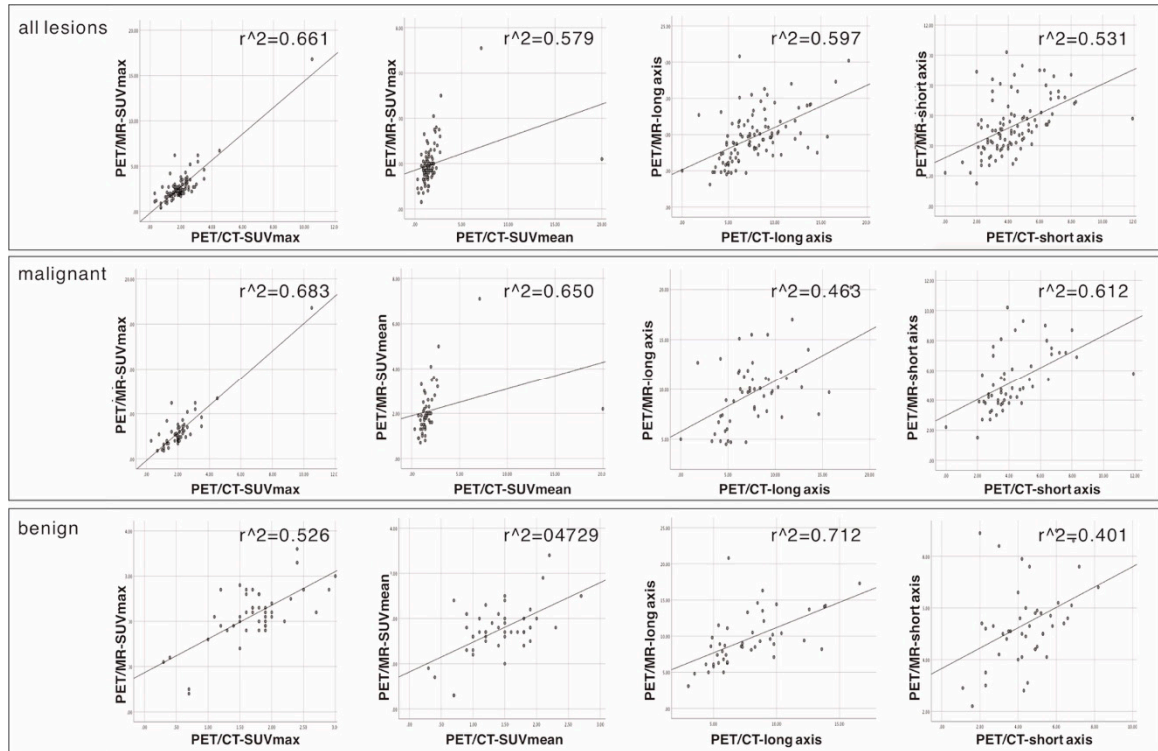

**Figure S3.** Correlation of SUVs and lymph node diameters measured on PET/MR and PET/CT
